# Supplementary material for: QTLs for constitutive aerenchyma from Zea nicaraguensis improve tolerance of maize to root-zone oxygen deficiency
Source: PubMed Central journal article supplement — J Exp Bot. 2019 Oct 6;70(21):6475–87. doi: 10.1093/jxb/erz403 (PMC6859735; doi:10.1093/jxb/erz403), 2019-10-06
Supplement: erz403_suppl_supplementary-table_s1_and_figures_s1-s4.pdf [file erz403_suppl_supplementary-table_s1_and_figures_s1-s4.pdf]

## Supplementary Material

Introgression of QTLs for constitutive aerenchyma formation from *Zea nicaraguensis* improves tolerance of root-zone oxygen deficiency in maize

Fangping Gong, Hirokazu Takahashi, Fumie Omori, Wei Wang, Yoshiro Mano, Mikio Nakazono





| Chromosome 7 |   |   |   |   |   |   |   | Chromosome 8 |   |   |   |   |   |   |   | Chromosome 9 |   |   |   |   |   | Chromosome 10 |   |   |   |   |   |   |   |   |   |   |   |
|--------------|---|---|---|---|---|---|---|--------------|---|---|---|---|---|---|---|--------------|---|---|---|---|---|---------------|---|---|---|---|---|---|---|---|---|---|---|
|              |   |   |   |   |   |   |   |              |   |   |   |   |   |   |   |              |   |   |   |   |   |               |   |   |   |   |   |   |   |   |   |   |   |
| A            | A | A | A | A | A | A | A | A            | A | A | A | A | A | A | A | A            | A | A | A | A | A | A             | A | A | A | A | A | A | A | A | A | A | A |
| A            | A | A | A | A | A | A | A | A            | A | A | A | A | A | A | A | A            | A | A | A | A | A | A             | A | A | A | A | A | A | A | A | A | A | A |
|              |   |   |   |   |   |   |   |              |   |   |   |   |   |   |   |              |   |   |   |   |   |               |   |   |   |   |   |   |   |   |   |   |   |
|              |   |   |   |   |   |   |   |              |   |   |   |   |   |   |   |              |   |   |   |   |   |               |   |   |   |   |   |   |   |   |   |   |   |
|              |   |   |   |   |   |   |   |              |   |   |   |   |   |   |   |              |   |   |   |   |   |               |   |   |   |   |   |   |   |   |   |   |   |
|              |   |   |   |   |   |   |   |              |   |   |   |   |   |   |   |              |   |   |   |   |   |               |   |   |   |   |   |   |   |   |   |   |   |
|              |   |   |   |   |   |   |   |              |   |   |   |   |   |   |   |              |   |   |   |   |   |               |   |   |   |   |   |   |   |   |   |   |   |
|              |   |   |   |   |   |   |   |              |   |   |   |   |   |   |   |              |   |   |   |   |   |               |   |   |   |   |   |   |   |   |   |   |   |
|              |   |   |   |   |   |   |   |              |   |   |   |   |   |   |   |              |   |   |   |   |   |               |   |   |   |   |   |   |   |   |   |   |   |
|              |   |   |   |   |   |   |   |              |   |   |   |   |   |   |   |              |   |   |   |   |   |               |   |   |   |   |   |   |   |   |   |   |   |
|              |   |   |   |   |   |   |   |              |   |   |   |   |   |   |   |              |   |   |   |   |   |               |   |   |   |   |   |   |   |   |   |   |   |
|              |   |   |   |   |   |   |   |              |   |   |   |   |   |   |   |              |   |   |   |   |   |               |   |   |   |   |   |   |   |   |   |   |   |
|              |   |   |   |   |   |   |   |              |   |   |   |   |   |   |   |              |   |   |   |   |   |               |   |   |   |   |   |   |   |   |   |   |   |
|              |   |   |   |   |   |   |   |              |   |   |   |   |   |   |   |              |   |   |   |   |   |               |   |   |   |   |   |   |   |   |   |   |   |
|              |   |   |   |   |   |   |   |              |   |   |   |   |   |   |   |              |   |   |   |   |   |               |   |   |   |   |   |   |   |   |   |   |   |
|              |   |   |   |   |   |   |   |              |   |   |   |   |   |   |   |              |   |   |   |   |   |               |   |   |   |   |   |   |   |   |   |   |   |
|              |   |   |   |   |   |   |   |              |   |   |   |   |   |   |   |              |   |   |   |   |   |               |   |   |   |   |   |   |   |   |   |   |   |
|              |   |   |   |   |   |   |   |              |   |   |   |   |   |   |   |              |   |   |   |   |   |               |   |   |   |   |   |   |   |   |   |   |   |
|              |   |   |   |   |   |   |   |              |   |   |   |   |   |   |   |              |   |   |   |   |   |               |   |   |   |   |   |   |   |   |   |   |   |
|              |   |   |   |   |   |   |   |              |   |   |   |   |   |   |   |              |   |   |   |   |   |               |   |   |   |   |   |   |   |   |   |   |   |
|              |   |   |   |   |   |   |   |              |   |   |   |   |   |   |   |              |   |   |   |   |   |               |   |   |   |   |   |   |   |   |   |   |   |
|              |   |   |   |   |   |   |   |              |   |   |   |   |   |   |   |              |   |   |   |   |   |               |   |   |   |   |   |   |   |   |   |   |   |
|              |   |   |   |   |   |   |   |              |   |   |   |   |   |   |   |              |   |   |   |   |   |               |   |   |   |   |   |   |   |   |   |   |   |
|              |   |   |   |   |   |   |   |              |   |   |   |   |   |   |   |              |   |   |   |   |   |               |   |   |   |   |   |   |   |   |   |   |   |
|              |   |   |   |   |   |   |   |              |   |   |   |   |   |   |   |              |   |   |   |   |   |               |   |   |   |   |   |   |   |   |   |   |   |
|              |   |   |   |   |   |   |   |              |   |   |   |   |   |   |   |              |   |   |   |   |   |               |   |   |   |   |   |   |   |   |   |   |   |
|              |   |   |   |   |   |   |   |              |   |   |   |   |   |   |   |              |   |   |   |   |   |               |   |   |   |   |   |   |   |   |   |   |   |
|              |   |   |   |   |   |   |   |              |   |   |   |   |   |   |   |              |   |   |   |   |   |               |   |   |   |   |   |   |   |   |   |   |   |
|              |   |   |   |   |   |   |   |              |   |   |   |   |   |   |   |              |   |   |   |   |   |               |   |   |   |   |   |   |   |   |   |   |   |
|              |   |   |   |   |   |   |   |              |   |   |   |   |   |   |   |              |   |   |   |   |   |               |   |   |   |   |   |   |   |   |   |   |   |
|              |   |   |   |   |   |   |   |              |   |   |   |   |   |   |   |              |   |   |   |   |   |               |   |   |   |   |   |   |   |   |   |   |   |
|              |   |   |   |   |   |   |   |              |   |   |   |   |   |   |   |              |   |   |   |   |   |               |   |   |   |   |   |   |   |   |   |   |   |
|              |   |   |   |   |   |   |   |              |   |   |   |   |   |   |   |              |   |   |   |   |   |               |   |   |   |   |   |   |   |   |   |   |   |
|              |   |   |   |   |   |   |   |              |   |   |   |   |   |   |   |              |   |   |   |   |   |               |   |   |   |   |   |   |   |   |   |   |   |
|              |   |   |   |   |   |   |   |              |   |   |   |   |   |   |   |              |   |   |   |   |   |               |   |   |   |   |   |   |   |   |   |   |   |
|              |   |   |   |   |   |   |   |              |   |   |   |   |   |   |   |              |   |   |   |   |   |               |   |   |   |   |   |   |   |   |   |   |   |
|              |   |   |   |   |   |   |   |              |   |   |   |   |   |   |   |              |   |   |   |   |   |               |   |   |   |   |   |   |   |   |   |   |   |
|              |   |   |   |   |   |   |   |              |   |   |   |   |   |   |   |              |   |   |   |   |   |               |   |   |   |   |   |   |   |   |   |   |   |
|              |   |   |   |   |   |   |   |              |   |   |   |   |   |   |   |              |   |   |   |   |   |               |   |   |   |   |   |   |   |   |   |   |   |
|              |   |   |   |   |   |   |   |              |   |   |   |   |   |   |   |              |   |   |   |   |   |               |   |   |   |   |   |   |   |   |   |   |   |
|              |   |   |   |   |   |   |   |              |   |   |   |   |   |   |   |              |   |   |   |   |   |               |   |   |   |   |   |   |   |   |   |   |   |
|              |   |   |   |   |   |   |   |              |   |   |   |   |   |   |   |              |   |   |   |   |   |               |   |   |   |   |   |   |   |   |   |   |   |
|              |   |   |   |   |   |   |   |              |   |   |   |   |   |   |   |              |   |   |   |   |   |               |   |   |   |   |   |   |   |   |   |   |   |
|              |   |   |   |   |   |   |   |              |   |   |   |   |   |   |   |              |   |   |   |   |   |               |   |   |   |   |   |   |   |   |   |   |   |
|              |   |   |   |   |   |   |   |              |   |   |   |   |   |   |   |              |   |   |   |   |   |               |   |   |   |   |   |   |   |   |   |   |   |
|              |   |   |   |   |   |   |   |              |   |   |   |   |   |   |   |              |   |   |   |   |   |               |   |   |   |   |   |   |   |   |   |   |   |
|              |   |   |   |   |   |   |   |              |   |   |   |   |   |   |   |              |   |   |   |   |   |               |   |   |   |   |   |   |   |   |   |   |   |
|              |   |   |   |   |   |   |   |              |   |   |   |   |   |   |   |              |   |   |   |   |   |               |   |   |   |   |   |   |   |   |   |   |   |
|              |   |   |   |   |   |   |   |              |   |   |   |   |   |   |   |              |   |   |   |   |   |               |   |   |   |   |   |   |   |   |   |   |   |
|              |   |   |   |   |   |   |   |              |   |   |   |   |   |   |   |              |   |   |   |   |   |               |   |   |   |   |   |   |   |   |   |   |   |
|              |   |   |   |   |   |   |   |              |   |   |   |   |   |   |   |              |   |   |   |   |   |               |   |   |   |   |   |   |   |   |   |   |   |
|              |   |   |   |   |   |   |   |              |   |   |   |   |   |   |   |              |   |   |   |   |   |               |   |   |   |   |   |   |   |   |   |   |   |
|              |   |   |   |   |   |   |   |              |   |   |   |   |   |   |   |              |   |   |   |   |   |               |   |   |   |   |   |   |   |   |   |   |   |
|              |   |   |   |   |   |   |   |              |   |   |   |   |   |   |   |              |   |   |   |   |   |               |   |   |   |   |   |   |   |   |   |   |   |
|              |   |   |   |   |   |   |   |              |   |   |   |   |   |   |   |              |   |   |   |   |   |               |   |   |   |   |   |   |   |   |   |   |   |
|              |   |   |   |   |   |   |   |              |   |   |   |   |   |   |   |              |   |   |   |   |   |               |   |   |   |   |   |   |   |   |   |   |   |
|              |   |   |   |   |   |   |   |              |   |   |   |   |   |   |   |              |   |   |   |   |   |               |   |   |   |   |   |   |   |   |   |   |   |
|              |   |   |   |   |   |   |   |              |   |   |   |   |   |   |   |              |   |   |   |   |   |               |   |   |   |   |   |   |   |   |   |   |   |
|              |   |   |   |   |   |   |   |              |   |   |   |   |   |   |   |              |   |   |   |   |   |               |   |   |   |   |   |   |   |   |   |   |   |
|              |   |   |   |   |   |   |   |              |   |   |   |   |   |   |   |              |   |   |   |   |   |               |   |   |   |   |   |   |   |   |   |   |   |
|              |   |   |   |   |   |   |   |              |   |   |   |   |   |   |   |              |   |   |   |   |   |               |   |   |   |   |   |   |   |   |   |   |   |
|              |   |   |   |   |   |   |   |              |   |   |   |   |   |   |   |              |   |   |   |   |   |               |   |   |   |   |   |   |   |   |   |   |   |
|              |   |   |   |   |   |   |   |              |   |   |   |   |   |   |   |              |   |   |   |   |   |               |   |   |   |   |   |   |   |   |   |   |   |
|              |   |   |   |   |   |   |   |              |   |   |   |   |   |   |   |              |   |   |   |   |   |               |   |   |   |   |   |   |   |   |   |   |   |
|              |   |   |   |   |   |   |   |              |   |   |   |   |   |   |   |              |   |   |   |   |   |               |   |   |   |   |   |   |   |   |   |   |   |
|              |   |   |   |   |   |   |   |              |   |   |   |   |   |   |   |              |   |   |   |   |   |               |   |   |   |   |   |   |   |   |   |   |   |
|              |   |   |   |   |   |   |   |              |   |   |   |   |   |   |   |              |   |   |   |   |   |               |   |   |   |   |   |   |   |   |   |   |   |
|              |   |   |   |   |   |   |   |              |   |   |   |   |   |   |   |              |   |   |   |   |   |               |   |   |   |   |   |   |   |   |   |   |   |
|              |   |   |   |   |   |   |   |              |   |   |   |   |   |   |   |              |   |   |   |   |   |               |   |   |   |   |   |   |   |   |   |   |   |
|              |   |   |   |   |   |   |   |              |   |   |   |   |   |   |   |              |   |   |   |   |   |               |   |   |   |   |   |   |   |   |   |   |   |
|              |   |   |   |   |   |   |   |              |   |   |   |   |   |   |   |              |   |   |   |   |   |               |   |   |   |   |   |   |   |   |   |   |   |
|              |   |   |   |   |   |   |   |              |   |   |   |   |   |   |   |              |   |   |   |   |   |               |   |   |   |   |   |   |   |   |   |   |   |
|              |   |   |   |   |   |   |   |              |   |   |   |   |   |   |   |              |   |   |   |   |   |               |   |   |   |   |   |   |   |   |   |   |   |
|              |   |   |   |   |   |   |   |              |   |   |   |   |   |   |   |              |   |   |   |   |   |               |   |   |   |   |   |   |   |   |   |   |   |
|              |   |   |   |   |   |   |   |              |   |   |   |   |   |   |   |              |   |   |   |   |   |               |   |   |   |   |   |   |   |   |   |   |   |
|              |   |   |   |   |   |   |   |              |   |   |   |   |   |   |   |              |   |   |   |   |   |               |   |   |   |   |   |   |   |   |   |   |   |
|              |   |   |   |   |   |   |   |              |   |   |   |   |   |   |   |              |   |   |   |   |   |               |   |   |   |   |   |   |   |   |   |   |   |
|              |   |   |   |   |   |   |   |              |   |   |   |   |   |   |   |              |   |   |   |   |   |               |   |   |   |   |   |   |   |   |   |   |   |
|              |   |   |   |   |   |   |   |              |   |   |   |   |   |   |   |              |   |   |   |   |   |               |   |   |   |   |   |   |   |   |   |   |   |
|              |   |   |   |   |   |   |   |              |   |   |   |   |   |   |   |              |   |   |   |   |   |               |   |   |   |   |   |   |   |   |   |   |   |
|              |   |   |   |   |   |   |   |              |   |   |   |   |   |   |   |              |   |   |   |   |   |               |   |   |   |   |   |   |   |   |   |   |   |
|              |   |   |   |   |   |   |   |              |   |   |   |   |   |   |   |              |   |   |   |   |   |               |   |   |   |   |   |   |   |   |   |   |   |
|              |   |   |   |   |   |   |   |              |   |   |   |   |   |   |   |              |   |   |   |   |   |               |   |   |   |   |   |   |   |   |   |   |   |

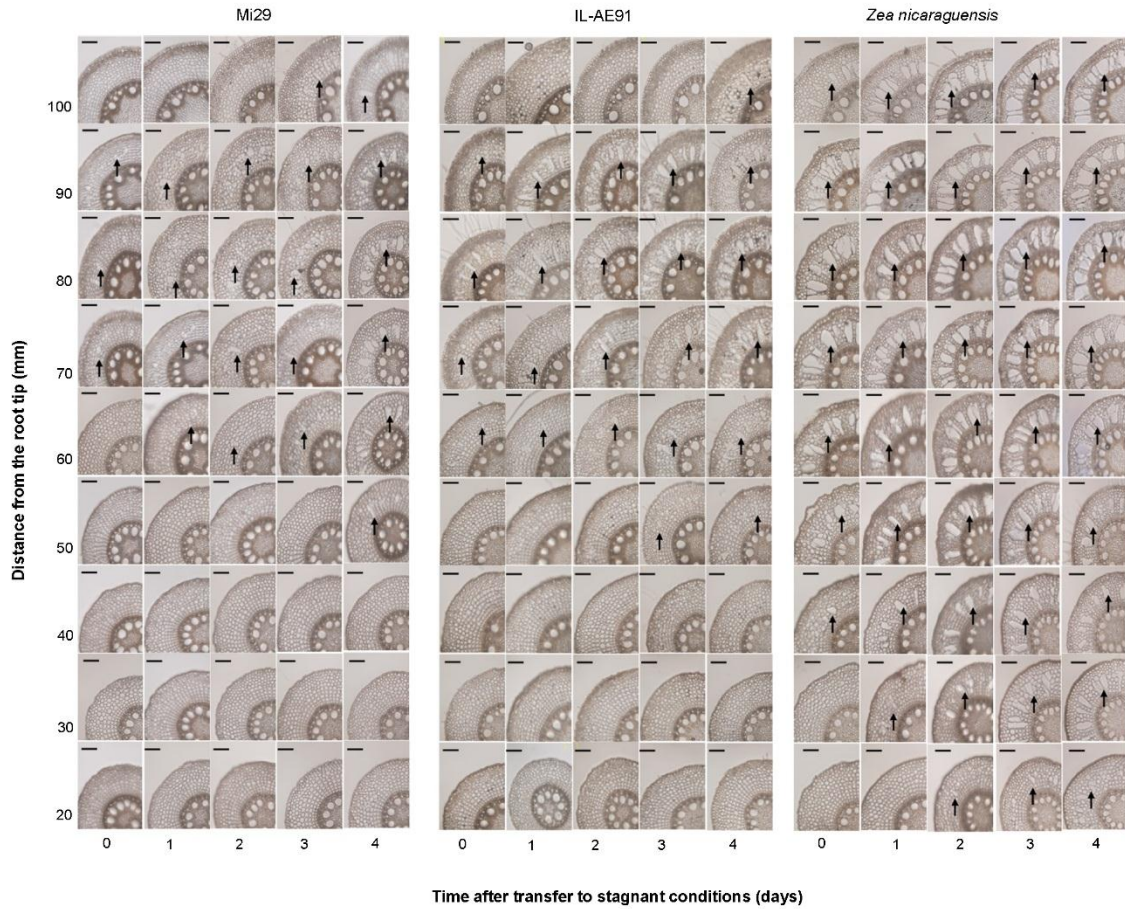

**Figure S1.** Cross-sections of Mi29, IL-AE91 and *Z. nicaraguensis* roots under stagnant deoxygenated conditions. Seedlings with around 100 mm long 4<sup>th</sup> nodal roots grown under aerated conditions were transferred to stagnant deoxygenated conditions for four days (days 0, 1, 2, 3 and 4). Distances from the root tip (mm) are displayed on the left side of figures. Arrows indicate aerenchyma. Bar = 100  $\mu$ m.

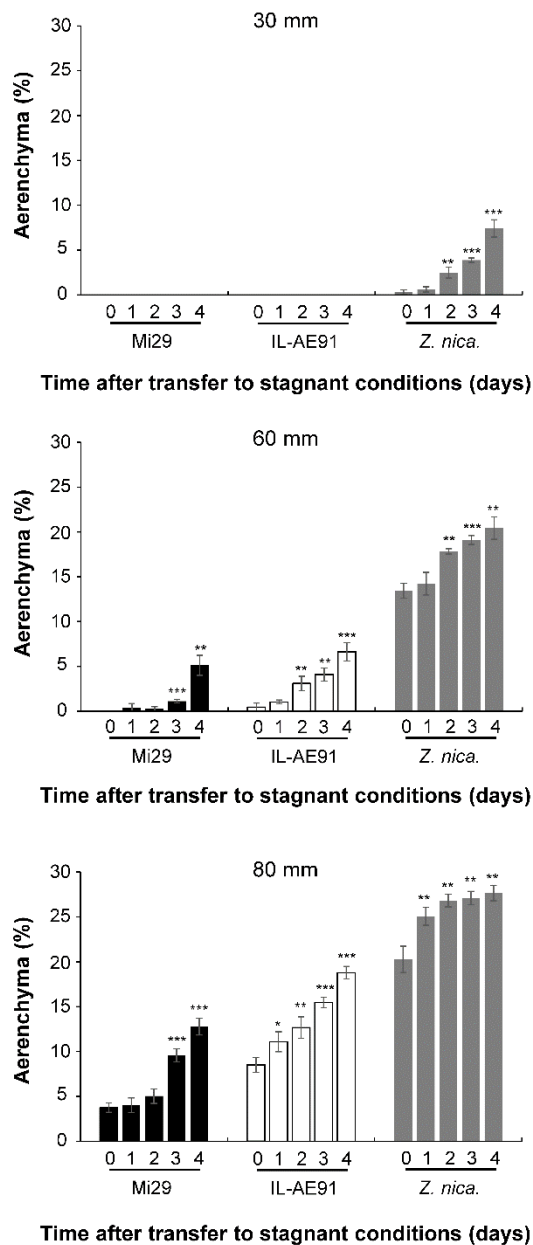

**Figure S2.** Aerenchyma formation at 30 mm, 60 mm and 80 mm from the root tips of Mi29, IL-AE91 and *Z. nicaraguensis* (*Z. nica.*) roots under stagnant deoxygenated conditions for four days (days 0, 1, 2, 3 and 4). Data was selected from Figure 6. Statistical analyses were performed using one-way ANOVA followed by Dunnett's multiple comparisons test. \*, \*\* and \*\*\* indicate significant differences between the value of each line at day 0 and those of days 1-4 at the  $P < 0.05$ ,  $P < 0.01$  and  $P < 0.001$  levels, respectively.

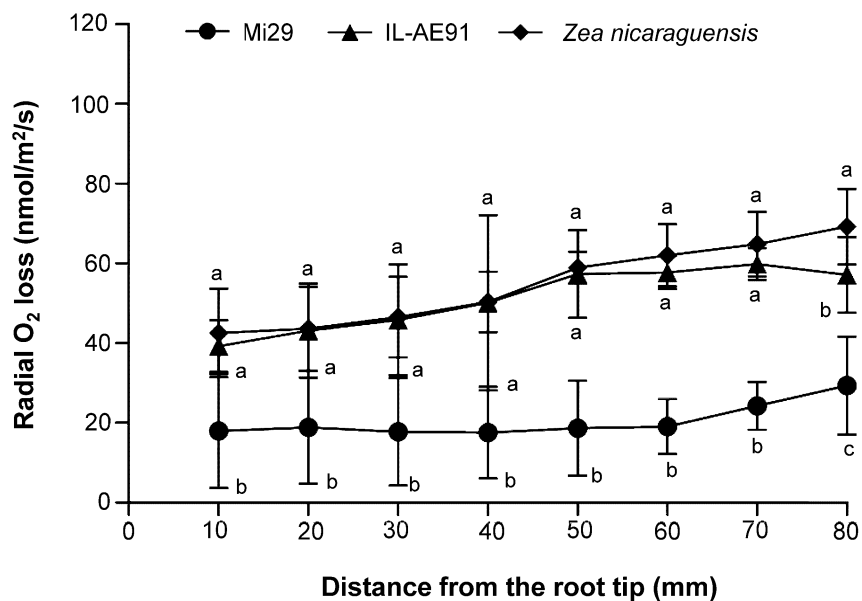

**Figure S3.** ROL from aerobically grown roots of Mi29, IL-AE91 and *Z. nicaraguensis* on day 4 under stagnant deoxygenated conditions. Different letters indicate significant difference within each line at each root position ( $P < 0.05$ , one-way ANOVA and then Tukey's test for multiple comparisons). Values are means  $\pm$  SD ( $n = 3$ ).

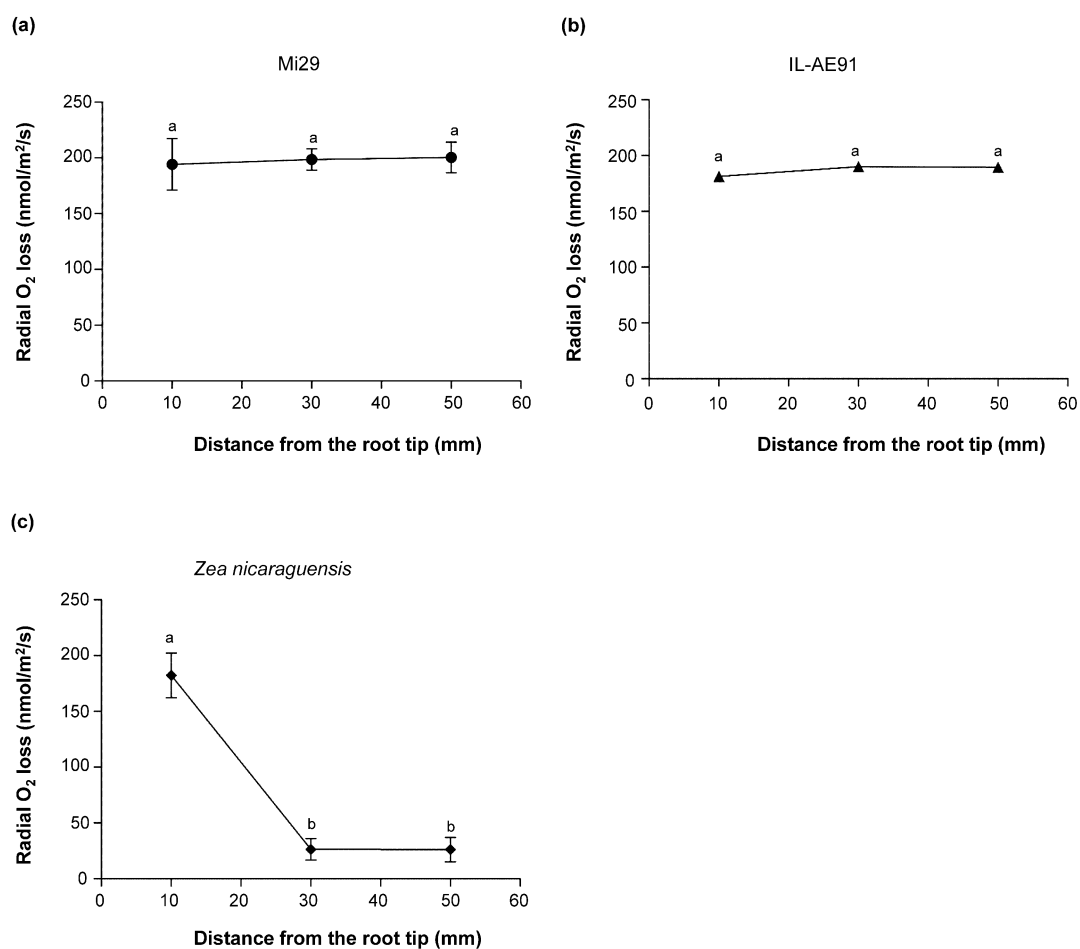

**Figure S4.** ROL from roots of Mi29, IL-AE91 and *Z. nicaraguensis* emerged after transfer to stagnant deoxygenated conditions. The total root lengths were 40-60 mm. Three root points including root tip (5-10 mm from the root tips), root middle (25-30 mm from the root tips) and root base (45-50 mm from the root tips) were used to measure the ROL amount. Different letters indicate significant difference between distances ( $P < 0.05$ , one-way ANOVA and then Tukey's test for multiple comparisons). Values are means  $\pm$  SD ( $n = 3$ ).
